# Supplementary material for: Insecticide-treated net (ITN) use, factors associated with non-use of ITNs, and occurrence of sand flies in three communities with reported cases of cutaneous leishmaniasis in Ghana
Source: PLOS journal article supplement (doi:10.1371/journal.pone.0261192), 2021-12-16
Supplement: S3 (10.1371/journal.pone.0261192.s003) [file journal.pone.0261192.s003]

## HOUSEHOLD QUESTIONNAIRE

| HOUSEHOLD INFORMATION PANEL                                          |                                                 | HH |
|----------------------------------------------------------------------|-------------------------------------------------|----|
| HH1A. Cluster number:    ___ ___ ___                                 | HH2. Household number:    ___ ___ ___   ___ ___ |    |
| HH1B. Community name: _____                                          |                                                 |    |
| HH3. Interviewer name and number:<br>Name _____                      | HH4. Supervisor name and number:<br>Name _____  |    |
| HH5. Day / Month / Year of interview:    ___ ___ / ___ ___ / ___ ___ |                                                 |    |
| HH6. Area:<br>Urban .....1<br>Rural.....2                            | HH7. District: Ho ..... 1                       |    |

*Allow respondent to the Household Questionnaire enough time to read the household consent form or to have it read to him/her before proceeding further with the questionnaire administration.*

*Is permission given?*

- ☐ *Yes, permission is given ⇒ Go to HH15 (on next page) to record the time and then begin the interview.*
- ☐ *No, permission is not given ⇒ Complete HH9. Discuss this result with your supervisor.*

|                                                                                                                                                                                                                                                                                                                                                                                                |                                                                                                                                                                                        |
|------------------------------------------------------------------------------------------------------------------------------------------------------------------------------------------------------------------------------------------------------------------------------------------------------------------------------------------------------------------------------------------------|----------------------------------------------------------------------------------------------------------------------------------------------------------------------------------------|
| <i>After all questionnaires for the household have been completed, fill in the following information:</i>                                                                                                                                                                                                                                                                                      |                                                                                                                                                                                        |
| HH8. Name of head of household: _____                                                                                                                                                                                                                                                                                                                                                          |                                                                                                                                                                                        |
| HH9. Result of household interview:<br>Completed .....01<br>No household member or no competent<br>respondent at home at time of visit ..... 02<br>Entire household absent for extended<br>period of time ..... 03<br>Refused ..... 04<br>Dwelling vacant / Address not a dwelling ..... 05<br>Dwelling destroyed ..... 06<br>Dwelling not found ..... 07<br>Other ( <i>specify</i> ) _____ 96 | HH10. Respondent to household questionnaire:<br>Name: _____<br>Line Number:                   ___ ___<br><br>HH11. Total number of household<br>members:                       ___ ___ |
| HH12. Number of women<br>age 15-49 years:           ___ ___                                                                                                                                                                                                                                                                                                                                    | HH13. Number of under-5s :           ___ ___                                                                                                                                           |

HH15.  
Record the time.

Hours .....\_\_ \_\_

Minutes .....\_\_ \_\_

## HOUSEHOLD LISTING FORM

HL

FIRST, PLEASE TELL ME THE NAME OF EACH PERSON WHO USUALLY LIVES HERE, STARTING WITH THE HEAD OF THE HOUSEHOLD.

List the head of the household in line 01. List names of all household members (HL2), their relationship to the household head (HL3), and their sex (HL4)

Then ask: ARE THERE ANY OTHERS WHO LIVE HERE, EVEN IF THEY ARE NOT AT HOME NOW?

If yes, complete listing for questions HL2-HL4. Then, ask questions starting with HL5 for each person at a time.

For household  
members age  
**15 and above**

Women  
age **15-49**

For  
children  
**under 5**  
years of  
age

For all household members

| HL1<br>Line no. | HL2.<br>Name | HL3.<br>WHAT IS THE RELATIONSHIP OF (name) TO THE HEAD OF HOUSEHOLD? | HL4.<br>IS (name) MALE OR FEMALE?<br><br>1 Male<br>2 Female | HL5.<br>WHAT IS (name)'s DATE OF BIRTH?<br><br>98 DK 9998 DK<br><br>Ensure that every person less than 6 years of age has a month and year of birth | HL6.<br>HOW OLD IS (name)?<br><br>Record in completed years. If age is 95 or above, record '95' | HL7.<br>WHAT IS (name)'s CURRENT MARITAL STATUS?<br><br>1 Married or living together<br>2 Divorced/ separated<br>3 Widowed<br>4 Never married or lived together | HL8.<br><br>Circle line number if woman is age <b>15-49</b> | HL9<br><br>Circle line number if child is <b>under 5</b> years of age | HL10.<br>WHAT IS (name)'s NATIONALITY?<br><br>Insert appropriate nationality code | HL11.<br>WHERE WAS (name) BORN?<br><br>IN THIS VILLAGE OR TOWN? ELSEWHERE?<br>Insert village or town name and appropriate birthplace code |                   | HL12.<br>FOR HOW MANY YEARS HAS (name) LIVED IN THIS VILLAGE/ TOWN?<br>Record zero if less than one year |
|-----------------|--------------|----------------------------------------------------------------------|-------------------------------------------------------------|-----------------------------------------------------------------------------------------------------------------------------------------------------|-------------------------------------------------------------------------------------------------|-----------------------------------------------------------------------------------------------------------------------------------------------------------------|-------------------------------------------------------------|-----------------------------------------------------------------------|-----------------------------------------------------------------------------------|-------------------------------------------------------------------------------------------------------------------------------------------|-------------------|----------------------------------------------------------------------------------------------------------|
| Line            | Name         | Relation                                                             | M F                                                         | MM Year                                                                                                                                             | Age                                                                                             | Marital status                                                                                                                                                  | 15-49                                                       | Under 5                                                               | Nationality                                                                       | Y N                                                                                                                                       | Village/Town Code | Years                                                                                                    |
| 01              |              | 0 1                                                                  | 1 2                                                         | __ __                                                                                                                                               | __ __                                                                                           | 1 2 3 4                                                                                                                                                         | 01                                                          | 01                                                                    | __ __                                                                             | 1 2→                                                                                                                                      | __ __             | __ __                                                                                                    |
| 02              |              |                                                                      | 1 2                                                         | __ __                                                                                                                                               | __ __                                                                                           | 1 2 3 4                                                                                                                                                         | 02                                                          | 02                                                                    | __ __                                                                             | 1 2→                                                                                                                                      | __ __             | __ __                                                                                                    |
| 03              |              |                                                                      | 1 2                                                         | __ __                                                                                                                                               | __ __                                                                                           | 1 2 3 4                                                                                                                                                         | 03                                                          | 03                                                                    | __ __                                                                             | 1 2→                                                                                                                                      | __ __             | __ __                                                                                                    |
| 04              |              |                                                                      | 1 2                                                         | __ __                                                                                                                                               | __ __                                                                                           | 1 2 3 4                                                                                                                                                         | 04                                                          | 04                                                                    | __ __                                                                             | 1 2→                                                                                                                                      | __ __             | __ __                                                                                                    |
| 05              |              |                                                                      | 1 2                                                         | __ __                                                                                                                                               | __ __                                                                                           | 1 2 3 4                                                                                                                                                         | 05                                                          | 05                                                                    | __ __                                                                             | 1 2→                                                                                                                                      | __ __             | __ __                                                                                                    |
| 06              |              |                                                                      | 1 2                                                         | __ __                                                                                                                                               | __ __                                                                                           | 1 2 3 4                                                                                                                                                         | 06                                                          | 06                                                                    | __ __                                                                             | 1 2→                                                                                                                                      | __ __             | __ __                                                                                                    |
| 07              |              |                                                                      | 1 2                                                         | __ __                                                                                                                                               | __ __                                                                                           | 1 2 3 4                                                                                                                                                         | 07                                                          | 07                                                                    | __ __                                                                             | 1 2→                                                                                                                                      | __ __             | __ __                                                                                                    |
| 08              |              |                                                                      | 1 2                                                         | __ __                                                                                                                                               | __ __                                                                                           | 1 2 3 4                                                                                                                                                         | 08                                                          | 08                                                                    | __ __                                                                             | 1 2→                                                                                                                                      | __ __             | __ __                                                                                                    |

| HL1<br>Line no. | HL2.<br>Name | HL3.<br>WHAT IS THE RELATIONSHIP OF (name) TO THE HEAD OF HOUSEHOLD? | HL4.<br>Is (name) MALE OR FEMALE ?<br><br>1 Male<br>2 Female | HL5.<br>WHAT IS (name)'s DATE OF BIRTH?<br><br>98 DK 9998 DK<br><br><i>Ensure that every person less than 6 years of age has a month and year of birth</i> |    | HL6.<br>HOW OLD IS (name)?<br><br><i>Record in completed years. If age is 95 or above, record '95'</i> | HL7.<br>WHAT IS (name)'s CURRENT MARITAL STATUS?<br><br>1 Married or living together<br>2 Divorced/separated<br>3 Widowed<br>4 Never married or lived together | HL8.<br><br><i>Circle line number if woman is age 15-49</i> | HL9<br><br><i>Circle line number if child is under 5 years of age</i> | HL10.<br>WHAT IS (name)'s NATIONALITY?<br><br><i>Insert appropriate nationality code</i> | HL11.<br>WHERE WAS (name) BORN?<br><br>IN THIS VILLAGE OR TOWN? ELSEWHERE?<br><br><i>Insert village or town name and appropriate birthplace code</i> |         |     | HL12.<br>FOR HOW MANY YEARS HAS (name) LIVED IN THIS VILLAGE/ TOWN?<br><i>Record zero if less than one year</i> |      |       |
|-----------------|--------------|----------------------------------------------------------------------|--------------------------------------------------------------|------------------------------------------------------------------------------------------------------------------------------------------------------------|----|--------------------------------------------------------------------------------------------------------|----------------------------------------------------------------------------------------------------------------------------------------------------------------|-------------------------------------------------------------|-----------------------------------------------------------------------|------------------------------------------------------------------------------------------|------------------------------------------------------------------------------------------------------------------------------------------------------|---------|-----|-----------------------------------------------------------------------------------------------------------------|------|-------|
| Line            | Name         | Relation                                                             | M                                                            | F                                                                                                                                                          | MM | Year                                                                                                   | Age                                                                                                                                                            | Marital status                                              | 15-49                                                                 | Under 5                                                                                  | Nationality                                                                                                                                          | Y       | N   | Village/Town                                                                                                    | Code | Years |
| 09              |              |                                                                      | 1                                                            | 2                                                                                                                                                          |    |                                                                                                        |                                                                                                                                                                | 1 2 3 4                                                     | 09                                                                    | 09                                                                                       | — —                                                                                                                                                  | 1       | 2→  |                                                                                                                 |      |       |
| 10              |              |                                                                      | 1                                                            | 2                                                                                                                                                          |    |                                                                                                        |                                                                                                                                                                | 1 2 3 4                                                     | 10                                                                    | 10                                                                                       | — —                                                                                                                                                  | 1       | 2→  |                                                                                                                 |      |       |
| 11              |              |                                                                      | 1                                                            | 2                                                                                                                                                          |    |                                                                                                        |                                                                                                                                                                | 1 2 3 4                                                     | 11                                                                    | 11                                                                                       |                                                                                                                                                      | 1 2 3 8 | — — | 1                                                                                                               | 2→   |       |
| 12              |              |                                                                      | 1                                                            | 2                                                                                                                                                          |    |                                                                                                        |                                                                                                                                                                | 1 2 3 4                                                     | 12                                                                    | 12                                                                                       |                                                                                                                                                      | 1 2 3 8 | — — | 1                                                                                                               | 2→   |       |
| 13              |              |                                                                      | 1                                                            | 2                                                                                                                                                          |    |                                                                                                        |                                                                                                                                                                | 1 2 3 4                                                     | 13                                                                    | 13                                                                                       |                                                                                                                                                      | 1 2 3 8 | — — | 1                                                                                                               | 2→   |       |
| 14              |              |                                                                      | 1                                                            | 2                                                                                                                                                          |    |                                                                                                        |                                                                                                                                                                | 1 2 3 4                                                     | 14                                                                    | 14                                                                                       |                                                                                                                                                      | 1 2 3 8 | — — | 1                                                                                                               | 2→   |       |
| 15              |              |                                                                      | 1                                                            | 2                                                                                                                                                          |    |                                                                                                        |                                                                                                                                                                | 1 2 3 4                                                     | 15                                                                    | 15                                                                                       |                                                                                                                                                      | 1 2 3 8 | — — | 1                                                                                                               | 2→   |       |

Tick here if additional questionnaire used ☐

Probe for additional household members.

Probe especially for any infants or small children not listed, and others who may not be members of the family (such as servants, friends) but who usually live in the household.

\* Codes for HL3: Relationship to head of household: ....

|                                 |                                   |
|---------------------------------|-----------------------------------|
| 01 Head                         | 09 Brother-In-Law / Sister-In-Law |
| 02 Wife / Husband               | 10 Uncle / Aunt                   |
| 03 Son / Daughter               | 11 Niece / Nephew                 |
| 04 Son-In-Law / Daughter-In-Law | 12 Other relative                 |
| 05 Grandchild                   | 13 Adopted / Foster / Stepchild   |
| 06 Parent                       | 14 Not related                    |
| 07 Parent-In-Law                | 98 Don't know                     |
| 08 Brother / Sister             |                                   |

Codes for HL10: Nationality

|                                                     |
|-----------------------------------------------------|
| 01 Ghanaian by birth                                |
| 02 Ghanaian by naturalisation                       |
| 03 Dual nationality (Ghanaian & other)              |
| 04 African                                          |
| 05 European                                         |
| 06 American (North, South & Caribbean)              |
| 07 Asian & Oceanian (incl. Australia & New Zealand) |
| 98 Don't know                                       |

Codes for HL11: Birthplace

|                       |                                        |
|-----------------------|----------------------------------------|
| 01 Western region     | 09 Upper East                          |
| 02 Central region     | 10 Upper West                          |
| 03 Greater Accra      | 11 Africa                              |
| 04 Volta region       | 12 Europe                              |
| 05 Eastern region     | 13 Americas (North, South & Caribbean) |
| 06 Ashanti region     | 14 Asia                                |
| 07 Brong Ahafo region | 15 Oceania                             |
| 08 Northern region    | 98 Don't know                          |

# RESIDENCE AND EDUCATION

ED

For all household members

For those 11 years  
of age and above

For those 5 years of age and above

|                         |                                                                                         |                                                                        |                                                                                               |                                                                                                                      |                                                                                                                                                                                                                                                |                                                                                                                |                                                                                                                                 |                                                                                                                                                                                                                                                                                                                                      |  |                                                                                                                                                                                                                                          |  |
|-------------------------|-----------------------------------------------------------------------------------------|------------------------------------------------------------------------|-----------------------------------------------------------------------------------------------|----------------------------------------------------------------------------------------------------------------------|------------------------------------------------------------------------------------------------------------------------------------------------------------------------------------------------------------------------------------------------|----------------------------------------------------------------------------------------------------------------|---------------------------------------------------------------------------------------------------------------------------------|--------------------------------------------------------------------------------------------------------------------------------------------------------------------------------------------------------------------------------------------------------------------------------------------------------------------------------------|--|------------------------------------------------------------------------------------------------------------------------------------------------------------------------------------------------------------------------------------------|--|
| ED1.<br><i>Line no.</i> | ED2.<br><i>Name and age</i><br><br><i>Copy from Household Listing Form, HL2 and HL6</i> | ED3.<br>DID ( <i>name</i> ) STAY HERE LAST NIGHT?<br><br>1 Yes<br>2 No | ED4.<br>DID ( <i>name</i> ) LIVE HERE MOST OF THE <u>LAST 6 MONTHS</u> ?<br><br>1 Yes<br>2 No | ED5.<br>DOES ( <i>name</i> ) EXPECT TO LIVE HERE FOR MOST OF THE <u>NEXT 6 MONTHS</u> ?<br><br>1 Yes<br>2 No<br>8 DK | ED6.<br>IN WHAT LANGUAGE CAN ( <i>name</i> ) READ AND WRITE?<br>Code:<br>1 None (not literate)<br>2 English only<br>3 Ghanaian only<br>4 English & Ghanaian<br>5 English & French<br>6 Other language than Ghanaian, English or French<br>8 DK | ED7.<br>HAS ( <i>name</i> ) EVER ATTENDED SCHOOL OR PRE-SCHOOL?<br><br>1 Yes<br>2 No ⇨<br><br><i>Next line</i> | ED8.<br>DURING THE PRESENT SCHOOL YEAR, DID ( <i>name</i> ) ATTEND SCHOOL OR PRESCHOOL AT ANY TIME?<br>1 Yes ⇨ED10<br>2 No ⇨ED9 | ED9.<br>WHAT IS THE HIGHEST LEVEL OF SCHOOL ( <i>name</i> ) ATTENDED?<br>WHAT IS HIGHEST GRADE ( <i>name</i> ) COMPLETED AT THIS LEVEL?<br>Level:<br>0 Preschool<br>1 Primary<br>2 Junior HS<br>3 Senior HS<br>4 Higher<br>8 DK<br><i>If level=0, skip to next line</i><br>Grade:<br>98 DK<br><i>If less than 1 grade, enter 00.</i> |  | ED10.<br>DURING THIS SCHOOL YEAR, WHICH LEVEL AND GRADE IS ( <i>name</i> ) ATTENDING?<br>Level:<br>0 Preschool<br>1 Primary<br>2 Junior HS<br>3 Senior HS<br>4 Higher<br>8 DK<br><i>If level=0, skip to next line</i><br>Grade:<br>98 DK |  |
|-------------------------|-----------------------------------------------------------------------------------------|------------------------------------------------------------------------|-----------------------------------------------------------------------------------------------|----------------------------------------------------------------------------------------------------------------------|------------------------------------------------------------------------------------------------------------------------------------------------------------------------------------------------------------------------------------------------|----------------------------------------------------------------------------------------------------------------|---------------------------------------------------------------------------------------------------------------------------------|--------------------------------------------------------------------------------------------------------------------------------------------------------------------------------------------------------------------------------------------------------------------------------------------------------------------------------------|--|------------------------------------------------------------------------------------------------------------------------------------------------------------------------------------------------------------------------------------------|--|

| Line | Name | Age | Yes | No | Yes | No | Yes | No | DK | Literacy code | Yes | No | Yes    | No | Level       | Grade            | Level       | Grade            |
|------|------|-----|-----|----|-----|----|-----|----|----|---------------|-----|----|--------|----|-------------|------------------|-------------|------------------|
| 01   |      |     | 1   | 2  | 1   | 2  | 1   | 2  | 8  | 1 2 3 4 5 6 8 | 1   | 2  | 1⇨ED10 | 2  | 0 1 2 3 4 8 | <i>Next line</i> | 0 1 2 3 4 8 | <i>Next line</i> |
| 02   |      |     | 1   | 2  | 1   | 2  | 1   | 2  | 8  | 1 2 3 4 5 6 8 | 1   | 2  | 1⇨ED10 | 2  | 0 1 2 3 4 8 | <i>Next line</i> | 0 1 2 3 4 8 | <i>Next line</i> |
| 03   |      |     | 1   | 2  | 1   | 2  | 1   | 2  | 8  | 1 2 3 4 5 6 8 | 1   | 2  | 1⇨ED10 | 2  | 0 1 2 3 4 8 | <i>Next line</i> | 0 1 2 3 4 8 | <i>Next line</i> |
| 04   |      |     | 1   | 2  | 1   | 2  | 1   | 2  | 8  | 1 2 3 4 5 6 8 | 1   | 2  | 1⇨ED10 | 2  | 0 1 2 3 4 8 | <i>Next line</i> | 0 1 2 3 4 8 | <i>Next line</i> |
| 05   |      |     | 1   | 2  | 1   | 2  | 1   | 2  | 8  | 1 2 3 4 5 6 8 | 1   | 2  | 1⇨ED10 | 2  | 0 1 2 3 4 8 | <i>Next line</i> | 0 1 2 3 4 8 | <i>Next line</i> |
| 06   |      |     | 1   | 2  | 1   | 2  | 1   | 2  | 8  | 1 2 3 4 5 6 8 | 1   | 2  | 1⇨ED10 | 2  | 0 1 2 3 4 8 | <i>Next line</i> | 0 1 2 3 4 8 | <i>Next line</i> |
| 07   |      |     | 1   | 2  | 1   | 2  | 1   | 2  | 8  | 1 2 3 4 5 6 8 | 1   | 2  | 1⇨ED10 | 2  | 0 1 2 3 4 8 | <i>Next line</i> | 0 1 2 3 4 8 | <i>Next line</i> |
| 08   |      |     | 1   | 2  | 1   | 2  | 1   | 2  | 8  | 1 2 3 4 5 6 8 | 1   | 2  | 1⇨ED10 | 2  | 0 1 2 3 4 8 | <i>Next line</i> | 0 1 2 3 4 8 | <i>Next line</i> |
| 09   |      |     | 1   | 2  | 1   | 2  | 1   | 2  | 8  | 1 2 3 4 5 6 8 | 1   | 2  | 1⇨ED10 | 2  | 0 1 2 3 4 8 | <i>Next line</i> | 0 1 2 3 4 8 | <i>Next line</i> |
| 10   |      |     | 1   | 2  | 1   | 2  | 1   | 2  | 8  | 1 2 3 4 5 6 8 | 1   | 2  | 1⇨ED10 | 2  | 0 1 2 3 4 8 | <i>Next line</i> | 0 1 2 3 4 8 | <i>Next line</i> |
| 11   |      |     | 1   | 2  | 1   | 2  | 1   | 2  | 8  | 1 2 3 4 5 6 8 | 1   | 2  | 1⇨ED10 | 2  | 0 1 2 3 4 8 | <i>Next line</i> | 0 1 2 3 4 8 | <i>Next line</i> |
| 12   |      |     | 1   | 2  | 1   | 2  | 1   | 2  | 8  | 1 2 3 4 5 6 8 | 1   | 2  | 1⇨ED10 | 2  | 0 1 2 3 4 8 | <i>Next line</i> | 0 1 2 3 4 8 | <i>Next line</i> |

| NO. | QUESTIONS AND FILTERS                                                                  | CODING CATEGORIES                            | SKIP |
|-----|----------------------------------------------------------------------------------------|----------------------------------------------|------|
| 001 | Does your household have any mosquito nets that can be used while sleeping?            | YES ..... 1....<br>NO ..... 2....            | 136A |
| 002 | How many mosquito nets does your household have?<br><br>IF 7 OR MORE NETS, RECORD '7'. | NUMBER OF NETS<br>..... <input type="text"/> |      |

|     |                                                                                                                           | NET #1                                                                                                                                             | NET #2                                                                                                                                              | NET #3                                                                                                                                                 |
|-----|---------------------------------------------------------------------------------------------------------------------------|----------------------------------------------------------------------------------------------------------------------------------------------------|-----------------------------------------------------------------------------------------------------------------------------------------------------|--------------------------------------------------------------------------------------------------------------------------------------------------------|
| 003 | ASK THE RESPONDENT TO SHOW YOU ALL THE NETS IN THE HOUSEHOLD<br><br>IF MORE THAN 3 NETS, USE ADDITIONAL QUESTIONNAIRE(S). | OBSERVED<br>HANGING ..... 1<br>OBSERVED<br>NOT HANGING<br>OR PACKAGED ... 2<br>NOT OBSERVED .. 3                                                   | OBSERVED<br>HANGING ..... 1<br>OBSERVED<br>NOT HANGING<br>OR PACKAGED ... 2<br>NOT OBSERVED .. 3                                                    | OBSERVED<br>HANGING ..... 1<br>OBSERVED<br>NOT HANGING<br>OR PACKAGED ..... 2<br>NOT OBSERVED ... 3                                                    |
| 004 | How many months ago did your household get the mosquito net?<br><br>IF LESS THAN ONE MONTH AGO, RECORD '00'.              | MONTHS <input type="text"/> <input type="text"/><br>AGO ...<br>MORE THAN 36<br>MONTHS AGO . 95<br>NOT SURE ..... 98                                | MONTHS <input type="text"/> <input type="text"/><br>AGO ...<br>MORE THAN 36<br>MONTHS AGO . 95<br>NOT SURE ..... 98                                 | MONTHS <input type="text"/> <input type="text"/><br>AGO ...<br>MORE THAN 36<br>MONTHS AGO .. 95<br>NOT SURE ..... 98                                   |
| 005 | Where did you get this net?                                                                                               | <b>PUBLIC SECTOR</b><br>GOVT. HOSPITAL/<br>POLYCLINIC ... 11<br>GOVT. HEALTH<br>CENTE ..... 12<br>GOVT. HEALTH<br>POST/CHPS ... 13<br>FIELDWORKER/ | <b>PUBLIC SECTOR</b><br>GOVT. HOSPITAL/<br>POLYCLINIC ... 11<br>GOVT. HEALTH<br>CENTER ..... 12<br>GOVT. HEALTH<br>POST/CHPS ... 13<br>FIELDWORKER/ | <b>PUBLIC SECTOR</b><br>GOVT. HOSPITAL/<br>POLYCLINIC ..... 11<br>GOVT. HEALTH<br>CENTE ..... 12<br>GOVT. HEALTH<br>POST/CHPS ..... 13<br>FIELDWORKER/ |

|  |  |                                                                                                                                                                                                                                                                                                                                                                                                                                                                                                                                                                                                            |                                                                                                                                                                                                                                                                                                                                                                                                                                                                                                                                                                                                           |                                                                                                                                                                                                                                                                                                                                                                                                                                                                                                                                                                                                                       |
|--|--|------------------------------------------------------------------------------------------------------------------------------------------------------------------------------------------------------------------------------------------------------------------------------------------------------------------------------------------------------------------------------------------------------------------------------------------------------------------------------------------------------------------------------------------------------------------------------------------------------------|-----------------------------------------------------------------------------------------------------------------------------------------------------------------------------------------------------------------------------------------------------------------------------------------------------------------------------------------------------------------------------------------------------------------------------------------------------------------------------------------------------------------------------------------------------------------------------------------------------------|-----------------------------------------------------------------------------------------------------------------------------------------------------------------------------------------------------------------------------------------------------------------------------------------------------------------------------------------------------------------------------------------------------------------------------------------------------------------------------------------------------------------------------------------------------------------------------------------------------------------------|
|  |  | <p>OUTREACH/ PEER</p> <p>EDUCATOR ..... 14</p> <p>CAMPAIGN ..... 15</p> <p>OTHER PUBLIC</p> <p>_____ 16</p> <p>(SPECIFY)</p> <p><b>PRIVATE MEDICAL</b></p> <p><b>SECTOR</b></p> <p>PRIVATE HOSPITAL/</p> <p>CLINIC ..... 21</p> <p>PHARMACY/CHEMICAL/</p> <p>DRUG STORE ... 22</p> <p>OTHER PRIVATE</p> <p>MEDICAL</p> <p>_____ 26</p> <p>(SPECIFY)</p> <p><b>OTHER SOURCE</b></p> <p>NGO/CBAs ..... 31</p> <p>SHOP/MARKET ... 32</p> <p>STREET VENDOR . 33</p> <p>PETROL STATION/</p> <p>MOBILE MART ... 34</p> <p>PRIMARY SCHOO . 35</p> <p>OTHER 36</p> <p>_____ (SPECIFY)</p> <p>DON'T KNOW ... 98</p> | <p>OUTREACH/ PEER</p> <p>EDUCATOR ..... 14</p> <p>CAMPAIGN ..... 15</p> <p>OTHER PUBLIC</p> <p>_____ 16</p> <p>(SPECIFY)</p> <p><b>PRIVATE MEDICAL</b></p> <p><b>SECTOR</b></p> <p>PRIVATE HOSPITAL</p> <p>CLINIC ..... 21</p> <p>PHARMACY/CHEMICAL/</p> <p>DRUG STORE ... 22</p> <p>OTHER PRIVATE</p> <p>MEDICAL</p> <p>_____ 26</p> <p>(SPECIFY)</p> <p><b>OTHER SOURCE</b></p> <p>NGO/CBAs ..... 31</p> <p>SHOP/MARKET ... 32</p> <p>STREET VENDOR . 33</p> <p>PETROL STATION/</p> <p>MOBILE MART ... 34</p> <p>PRIMARY SCHOO . 35</p> <p>OTHER 36</p> <p>_____ (SPECIFY)</p> <p>DON'T KNOW ... 98</p> | <p>OUTREACH/ PEER</p> <p>EDUCATOR ..... 14</p> <p>CAMPAIGN ..... 15</p> <p>OTHER PUBLIC</p> <p>_____ 16</p> <p>(SPECIFY)</p> <p><b>PRIVATE MEDICAL</b></p> <p><b>SECTOR</b></p> <p>PRIVATE HOSPITAL/</p> <p>CLINIC ..... 21</p> <p>PHARMACY/CHEMICAL/</p> <p>DRUG STORE ..... 22</p> <p>OTHER PRIVATE</p> <p>MEDICAL</p> <p>_____ 26</p> <p>(SPECIFY)</p> <p><b>OTHER SOURCE</b></p> <p>NGO/CBAs ..... 31</p> <p>SHOP/MARKET ..... 32</p> <p>STREET VENDOR .. 33</p> <p>PETROL STATION/</p> <p>MOBILE MART ..... 34</p> <p>PRIMARY SCHOOL .. 35</p> <p>OTHER 36</p> <p>_____ (SPECIFY)</p> <p>DON'T KNOW ..... 98</p> |
|--|--|------------------------------------------------------------------------------------------------------------------------------------------------------------------------------------------------------------------------------------------------------------------------------------------------------------------------------------------------------------------------------------------------------------------------------------------------------------------------------------------------------------------------------------------------------------------------------------------------------------|-----------------------------------------------------------------------------------------------------------------------------------------------------------------------------------------------------------------------------------------------------------------------------------------------------------------------------------------------------------------------------------------------------------------------------------------------------------------------------------------------------------------------------------------------------------------------------------------------------------|-----------------------------------------------------------------------------------------------------------------------------------------------------------------------------------------------------------------------------------------------------------------------------------------------------------------------------------------------------------------------------------------------------------------------------------------------------------------------------------------------------------------------------------------------------------------------------------------------------------------------|

|     |                                                                                                                                                                           | NET #1                                                                                                                                                                                                                                                                                                                                                                               | NET #2                                                                                                                                                                                                                                                                                                                                                                               | NET #3                                                                                                                                                                                                                                                                                                                                                                               |
|-----|---------------------------------------------------------------------------------------------------------------------------------------------------------------------------|--------------------------------------------------------------------------------------------------------------------------------------------------------------------------------------------------------------------------------------------------------------------------------------------------------------------------------------------------------------------------------------|--------------------------------------------------------------------------------------------------------------------------------------------------------------------------------------------------------------------------------------------------------------------------------------------------------------------------------------------------------------------------------------|--------------------------------------------------------------------------------------------------------------------------------------------------------------------------------------------------------------------------------------------------------------------------------------------------------------------------------------------------------------------------------------|
| 006 | <p>How much did it cost you to obtain this net?</p> <p>RECORD '00.00' IF FREE OF CHARGE.</p>                                                                              | <p>COST IN CEDIS</p> <div> <div></div> <div></div> <div>.</div> <div></div> <div></div> </div> <p>DON'T KNOW . . . 9998</p>                                                                                                                                                                                                                                                          | <p>COST IN CEDIS</p> <div> <div></div> <div></div> <div>.</div> <div></div> <div></div> </div> <p>DON'T KNOW . . . 9998</p>                                                                                                                                                                                                                                                          | <p>COST IN CEDIS</p> <div> <div></div> <div></div> <div>.</div> <div></div> <div></div> </div> <p>DON'T KNOW . . . 9998</p>                                                                                                                                                                                                                                                          |
| 007 | <p>OBSERVE OR ASK THE BRAND/TYPE OF MOSQUITO NET.</p> <p>IF BRAND IS UNKNOWN AND YOU CANNOT OBSERVE THE NET, SHOW PICTURES OF TYPICAL NET TYPES/BRANDS TO RESPONDENT.</p> | <p><b>LONG-LASTING</b></p> <p><b>INSECTICIDE-TREATED NET (LLIN)</b></p> <p>OLYSET . . . 10</p> <p>PERMANET . . . 11</p> <p>INTERCEPTOR . 12</p> <p>NETPROTECT . 13</p> <p>DURANET . . . 14</p> <p>LIFE NET . . . 15</p> <p>DAWA PLUS . . . 16</p> <p>MAGNET . . . 17</p> <p>YORKOOL . . . 18</p> <p>OTHER/ DK BRAND . . . 19</p> <p>(SKIP TO 134)</p> <p><b>'PRETREATED' NET</b></p> | <p><b>LONG-LASTING</b></p> <p><b>INSECTICIDE-TREATED NET (LLIN)</b></p> <p>OLYSET . . . 10</p> <p>PERMANET . . . 11</p> <p>INTERCEPTOR . 12</p> <p>NETPROTECT . 13</p> <p>DURANET . . . 14</p> <p>LIFE NET . . . 15</p> <p>DAWA PLUS . . . 16</p> <p>MAGNET . . . 17</p> <p>YORKOOL . . . 18</p> <p>OTHER/ DK BRAND . . . 19</p> <p>(SKIP TO 134)</p> <p><b>'PRETREATED' NET</b></p> | <p><b>LONG-LASTING</b></p> <p><b>INSECTICIDE-TREATED NET (LLIN)</b></p> <p>OLYSET . . . 10</p> <p>PERMANET . . . 11</p> <p>INTERCEPTOR . 12</p> <p>NETPROTECT . 13</p> <p>DURANET . . . 14</p> <p>LIFE NET . . . 15</p> <p>DAWA PLUS . . . 16</p> <p>MAGNET . . . 17</p> <p>YORKOOL . . . 18</p> <p>OTHER/ DK BRAND . . . 19</p> <p>(SKIP TO 134)</p> <p><b>'PRETREATED' NET</b></p> |



|     |                                                                                               |                                                                                                                                                                              |                                                                                                                                                                              |                                                                                                                                                                              |
|-----|-----------------------------------------------------------------------------------------------|------------------------------------------------------------------------------------------------------------------------------------------------------------------------------|------------------------------------------------------------------------------------------------------------------------------------------------------------------------------|------------------------------------------------------------------------------------------------------------------------------------------------------------------------------|
|     |                                                                                               | OTHER/<br><br>DK BRAND . . . 26<br><br>(SKIP TO 134)<br><br><b>OTHER</b><br><br>LOCALLY SEWN<br><br>NETS . . . . . 31<br><br>OTHER BRAND . . 96<br><br>DK BRAND . . . . . 98 | OTHER/<br><br>DK BRAND . . . 26<br><br>(SKIP TO 134)<br><br><b>OTHER</b><br><br>LOCALLY SEWN<br><br>NETS . . . . . 31<br><br>OTHER BRAND . . 96<br><br>DK BRAND . . . . . 98 | OTHER/<br><br>DK BRAND . . . 26<br><br>(SKIP TO 134)<br><br><b>OTHER</b><br><br>LOCALLY SEWN<br><br>NETS . . . . . 31<br><br>OTHER BRAND . . 96<br><br>DK BRAND . . . . . 98 |
| 008 | When you got the net, was it already treated with an insecticide to kill or repel mosquitoes? | YES . . . . . 1<br><br>NO . . . . . 2<br><br>NOT SURE . . . . . 8                                                                                                            | YES . . . . . 1<br><br>NO . . . . . 2<br><br>NOT SURE . . . . . 8                                                                                                            | YES . . . . . 1<br><br>NO . . . . . 2<br><br>NOT SURE . . . . . 8                                                                                                            |
| 009 | Did anyone sleep under this mosquito net last night?                                          | YES . . . . . 1<br><br>NO . . . . . 2<br><br>(SKIP TO 136)<br><br>NOT SURE . . . . . 8                                                                                       | YES . . . . . 1<br><br>NO . . . . . 2<br><br>(SKIP TO 136)<br><br>NOT SURE . . . . . 8                                                                                       | YES . . . . . 1<br><br>NO . . . . . 2<br><br>(SKIP TO 136)<br><br>NOT SURE . . . . . 8                                                                                       |

|     |                                                                                                                                | NET #1                                                                                                                                                                                                                                                                                                             | NET #2 | NET #3 |  |  |                                                                                                                                                                                                                                                                                                                    |  |  |  |  |                                                                                                                                                                                                                                                                                                                    |  |  |  |  |
|-----|--------------------------------------------------------------------------------------------------------------------------------|--------------------------------------------------------------------------------------------------------------------------------------------------------------------------------------------------------------------------------------------------------------------------------------------------------------------|--------|--------|--|--|--------------------------------------------------------------------------------------------------------------------------------------------------------------------------------------------------------------------------------------------------------------------------------------------------------------------|--|--|--|--|--------------------------------------------------------------------------------------------------------------------------------------------------------------------------------------------------------------------------------------------------------------------------------------------------------------------|--|--|--|--|
| 010 | Who slept under this mosquito net last night?<br><br><br>RECORD THE PERSON'S NAME AND LINE NUMBER FROM THE HOUSEHOLD SCHEDULE. | NAME _____<br><br><br>LINE <table border="1" style="display: inline-table; vertical-align: middle;"><tr><td> </td><td> </td></tr></table><br>NO. ....<br><br>NAME _____<br><br><br>LINE <table border="1" style="display: inline-table; vertical-align: middle;"><tr><td> </td><td> </td></tr></table><br>NO. .... |        |        |  |  | NAME _____<br><br><br>LINE <table border="1" style="display: inline-table; vertical-align: middle;"><tr><td> </td><td> </td></tr></table><br>NO. ....<br><br>NAME _____<br><br><br>LINE <table border="1" style="display: inline-table; vertical-align: middle;"><tr><td> </td><td> </td></tr></table><br>NO. .... |  |  |  |  | NAME _____<br><br><br>LINE <table border="1" style="display: inline-table; vertical-align: middle;"><tr><td> </td><td> </td></tr></table><br>NO. ....<br><br>NAME _____<br><br><br>LINE <table border="1" style="display: inline-table; vertical-align: middle;"><tr><td> </td><td> </td></tr></table><br>NO. .... |  |  |  |  |
|     |                                                                                                                                |                                                                                                                                                                                                                                                                                                                    |        |        |  |  |                                                                                                                                                                                                                                                                                                                    |  |  |  |  |                                                                                                                                                                                                                                                                                                                    |  |  |  |  |
|     |                                                                                                                                |                                                                                                                                                                                                                                                                                                                    |        |        |  |  |                                                                                                                                                                                                                                                                                                                    |  |  |  |  |                                                                                                                                                                                                                                                                                                                    |  |  |  |  |
|     |                                                                                                                                |                                                                                                                                                                                                                                                                                                                    |        |        |  |  |                                                                                                                                                                                                                                                                                                                    |  |  |  |  |                                                                                                                                                                                                                                                                                                                    |  |  |  |  |
|     |                                                                                                                                |                                                                                                                                                                                                                                                                                                                    |        |        |  |  |                                                                                                                                                                                                                                                                                                                    |  |  |  |  |                                                                                                                                                                                                                                                                                                                    |  |  |  |  |
|     |                                                                                                                                |                                                                                                                                                                                                                                                                                                                    |        |        |  |  |                                                                                                                                                                                                                                                                                                                    |  |  |  |  |                                                                                                                                                                                                                                                                                                                    |  |  |  |  |
|     |                                                                                                                                |                                                                                                                                                                                                                                                                                                                    |        |        |  |  |                                                                                                                                                                                                                                                                                                                    |  |  |  |  |                                                                                                                                                                                                                                                                                                                    |  |  |  |  |

|     |  |                                                                                                                                                          |                                                                                                                                                          |                                                                                                                                                          |
|-----|--|----------------------------------------------------------------------------------------------------------------------------------------------------------|----------------------------------------------------------------------------------------------------------------------------------------------------------|----------------------------------------------------------------------------------------------------------------------------------------------------------|
|     |  | NAME_____<br><br>LINE NO. .... <input type="text"/> <input type="text"/><br><br>NAME_____<br><br>LINE NO. .... <input type="text"/> <input type="text"/> | NAME_____<br><br>LINE NO. .... <input type="text"/> <input type="text"/><br><br>NAME_____<br><br>LINE NO. .... <input type="text"/> <input type="text"/> | NAME_____<br><br>LINE NO. .... <input type="text"/> <input type="text"/><br><br>NAME_____<br><br>LINE NO. .... <input type="text"/> <input type="text"/> |
| 011 |  | GO BACK TO 010 FOR<br>NEXT NET; OR, IF NO<br>MORE NETS,<br>GO TO 012A.                                                                                   | GO BACK TO 010 FOR<br>NEXT NET; OR, IF NO<br>MORE NETS,<br>GO TO 012A.                                                                                   | GO TO 010 IN FIRST<br>COLUMN OF A NEW<br>QUESTIONNAIRE;<br>OR, IF NO MORE<br>NETS, GO TO 012A.                                                           |

NO.      QUESTIONS AND FILTERS    CODING CATEGORIES      SKIP

012A    During the last 12 months has any member of your      YES ..... 1  
household disposed of any treated net?      NO ..... 2  
DON'T KNOW ..... 3

(SKIP TO 136E)

012B    How did you dispose of your last treated mosquito net?    BURNED ..... 1  
  
BURIED ..... 2  
  
GARBAGE OR REFUSE DUMP ..... 3  
  
REUSED FOR OTHER PURPOSE ..... 4  
  
OTHER ..... 6  
\_\_\_\_\_

(SPECIFY)

DON'T KNOW ..... 8

|      |                                                      |                             |   |
|------|------------------------------------------------------|-----------------------------|---|
| 012C | How long did you use the net before disposing of it? | LESS THAN 2 YEARS . . . . . | 1 |
|      |                                                      | 2-4 YEARS . . . . .         | 2 |
|      |                                                      | MORE THAN 4 YEARS . . . . . | 3 |
|      |                                                      | DON'T KNOW . . . . .        | 8 |
|      |                                                      |                             |   |

---

|      |                                                     |                                     |   |
|------|-----------------------------------------------------|-------------------------------------|---|
| 012D | What was the main reason for disposing of this net? | TORN . . . . .                      | 1 |
|      |                                                     | COULD NOT REPEL MOSQUITOS ANYMORE . | 2 |
|      |                                                     | GOT A NEW ONE . . . . .             | 3 |
|      |                                                     | OTHER (SPECIFY) . . . . .           | 6 |
|      |                                                     | DON'T KNOW . . . . .                | 8 |

---

|      |                                    |                      |   |
|------|------------------------------------|----------------------|---|
| 012A | Have you ever heard about malaria? | YES . . . . .        | 1 |
|      |                                    | NO . . . . .         | 2 |
|      |                                    | DON'T KNOW . . . . . | 3 |

---

|     |                                                                             |                                        |     |    |
|-----|-----------------------------------------------------------------------------|----------------------------------------|-----|----|
| 013 | In the past 6 months, have you seen or heard any<br>messages about malaria: |                                        | YES | NO |
|     |                                                                             | a) On the television?                  |     |    |
|     |                                                                             | TELEVISION . . . . .                   | 1   | 2  |
|     |                                                                             | b) On the radio?                       |     |    |
|     |                                                                             | RADIO . . . . .                        | 1   | 2  |
|     |                                                                             | c) In a newspaper or magazine?         |     |    |
|     |                                                                             | NEWSPAPER/                             |     |    |
|     |                                                                             | MAGAZINE . . . . .                     | 1   | 2  |
|     |                                                                             | d) From a poster?                      |     |    |
|     |                                                                             | POSTER . . . . .                       | 1   | 2  |
|     |                                                                             | e) From leaflets or brochures?         |     |    |
|     |                                                                             | LEAFLET/BROCHURE . . . . .             | 1   | 2  |
|     |                                                                             | f) From a health worker?               |     |    |
|     |                                                                             | HEALTH WORKER . . . . .                | 1   | 2  |
|     |                                                                             | g) From a Community volunteer/CHW/CBA? |     |    |
|     |                                                                             | VOLUNTEER . . . . .                    | 1   | 2  |
|     |                                                                             | h) Anyone/anywhere else? Where/Whom?   |     |    |
|     |                                                                             | OTHER . . . . .                        | 1   | 2  |

---
